# Supplementary material for: The stem cell factor SALL4 is an essential transcriptional regulator in mixed lineage leukemia-rearranged leukemogenesis
Source: PubMed Central journal article supplement (PMC5627455; doi:10.1186/s13045-017-0531-y), 2017-10-03
Supplement: 13045_2017_531_MOESM2_ESM.pdf [file 13045_2017_531_MOESM2_ESM.pdf]

## SALL4 Bound Genes

Pcdhga4  
Tmed6  
Slc39a10  
Hecw2  
Fev  
Speg  
Slc45a3  
Pik3c2b  
Cacna1s  
Rnf2  
Rasal2  
Nos1ap  
Nhlh1  
Susd4  
Plxna2  
Hivep2  
Slc35d3  
Eya4  
Pcdhgb2  
Marcks  
Amd1  
Ostm1  
Aim1  
Grik2  
D630037F22Rik  
Adarb1  
Nfyb  
Usp44  
Cnot2  
Ppm1h  
Tug1  
Meis1  
Aftph  
Otx1  
Tlx3  
Rnf145  
Maml1  
Lym7  
Pcdhga5  
Kcnj12  
Ulk2  
Ntn1  
Cpd  
Nf1  
Gm11423  
2410003L11Rik

Lasp1  
Ikzf3  
Cyb561  
Fam20a  
Sdk2  
Cdr2l  
Sphk1  
Jmjd6  
Cbx2  
Bahcc1  
Nploc4  
Lpin1  
E2f6  
Cys1  
Id2  
Lamb1  
Ccdc71l  
Foxg1  
Ttc6  
Trappc6b  
Dnaaf2  
Ccdc177  
Slc8a3  
Acot4  
Bcl11b  
Gm16596  
A730018C14Rik  
Jag2  
Brf1  
Kif13a  
Pitx1  
Hnrnpk  
C130071C03Rik  
Otp  
Paip1  
LOC101055764  
Top2b  
Txndc16  
Ero1l  
Ap1g2  
Nefl  
Wbp4  
Farp1  
Osr2  
Tmem65  
E430025E21Rik  
2810039B14Rik

Dgat1  
Elfn2  
Pdgfb  
Mcat  
Wnt7b  
Cerk  
Spats2  
Tbx1  
Lpp  
Fgf12  
Zdhhc23  
Scaf4  
Gm3004  
Dyrk1a  
Ets2  
Mdga1  
Ephx3  
Cul9  
Ppp2r5d  
1700001C19Rik  
Trem12  
Plcl2  
St6gal2  
Pja2  
Tmem200c  
Pcdhga6  
Yipf4  
Heatr5b  
Arhgap12  
Colec12  
1010001N08Rik  
Pcdhga7  
Pcdhga8  
Pcdhgb4  
Pcdhga1  
Pcdh1  
Afap1l1  
Pcdhga9  
Skor2  
Gm960  
Pcdhgb7  
Pcdhga10  
Mzb1  
2700081O15Rik  
Pcdhgb6  
Pcdhgb5  
Foxd4

Cpeb3  
Frat1  
Nkx2-3  
Lbx1  
9130011E15Rik  
Mir146b  
Nt5c2  
Sh3pxd2a  
Emx2os  
Gpr158  
Lhx3  
Ntng2  
Gle1  
Lypd6  
Lrp2  
Dlx1as  
Sp9  
Evx2  
Hoxd12  
Nfe2l2  
Ehf  
Hipk3  
Grem1  
H3f3c  
Kcnip3  
Gfra4  
Sel1l2  
Sox12  
Pxmp4  
Raly  
Soga1  
Fitm2  
Zmynd8  
Stau1  
Bmp7  
Dido1  
Mir124a-3  
Spata5  
Elf2  
Nhlrc3  
Commd2  
Shox2  
She  
Cgn  
Igsf3  
Neurog2  
Ddit4l

Rap1gds1  
Lrrc7  
Vmn1r2  
Esrp1  
Tmem64  
Igfbpl1  
Palm2  
Gng10  
Snx30  
Atp6v1g1  
Rasef  
Lrp8  
Foxd2  
9130206I24Rik  
Tal1  
Cyp4b1  
Rnf220  
Mycl1  
Zcchc17  
Ahdc1  
1810019J16Rik  
Arid1a  
Epha8  
Ece1  
Pax7  
Spen  
6330411D24Rik  
Casz1  
Clstn1  
Gpr153  
Gatad1  
Pus7  
Shh  
Letm1  
Htra3  
Lap3  
1600023N17Rik  
Pi4k2b  
4932441J04Rik  
Fam114a1  
Slc30a9  
Igfbp7  
  
Prdm8  
Fam69a  
Gm10419  
Fgfr1

11-Sep

Sgsm1  
Cabp1  
Msi1  
C330018A13Rik  
1700048F04Rik  
Wbscr22  
Pdgfa  
4930500L23Rik  
Radil  
Flt3  
Mtus2  
Kl  
Dlx5  
Mdfic  
Smo  
Zfp467  
Fam221a  
Hoxa9  
Hoxa11  
Scrn1  
Serbp1  
Tcf7l1  
Dqx1  
Fbxo41  
Arl8b  
Srgap3  
Cand2  
Tspan9  
Vmn1r59  
Npas1  
Fbxo46  
Atp1a3  
Grik5  
Sptbn4  
Ttc9b  
Cebpa  
Shank1  
Myh14  
Klf13  
Apba2  
Igf1r  
A730056A06Rik  
Pde8a  
Gm4980  
Arhgef17  
Rbmxl2  
Rras2

Prr14  
Mcmbp  
Hmx3  
Adam12  
Gm5607  
Gm9908  
Cpe  
4933436C20Rik  
Ccdc79  
Nae1  
Vps4a  
Fendrr  
Sult5a1  
Egln1  
Tsnax  
Olfm2  
Ddx6  
Cadm1  
Neo1  
Rbpms2  
Ibtk  
Msl2  
Actl11  
Smarcc1  
Kif9  
Trank1  
Trim71  
9530059O14Rik  
Slc6a20a  
Cryba2  
2810025M15Rik  
Gm20114  
Pex7  
5930403N24Rik  
Msl3l2  
5330438D12Rik  
Morc2a  
Ehbp1  
Ranbp17  
Canx  
Hint1  
Lig3  
E130012A19Rik  
B230217C12Rik  
Zpbp2  
Ube2o  
Mettl23

Gm11772  
Tspan10  
3110039M20Rik  
Pnn  
9330151L19Rik  
Acot3  
Evl  
B020018J22Rik  
Nudt14  
Mir7-1  
Mir9-2  
Gpr137c  
Jph4  
Elf1  
BC048602  
Ube2d4  
Nsmce2  
Scrt1  
Tspo  
4930588K23Rik  
Gramd1c  
Brd4  
Srf  
Pex6  
Al661453  
B430306N03Rik  
Gata6  
Prob1  
Pcdhga2  
LOC101056140  
Rtn3  
A330032B11Rik  
2310034G01Rik  
Ina  
Emx2  
Qsox2  
6530402F18Rik  
Sptan1  
Dlx2  
Cir1  
Hoxd13  
Hoxd11  
E030042O20Rik  
Rtf1  
Adam33  
MacroD2  
Tldc2



2310001K24Rik  
4930577N17Rik  
Proser1  
Rsrc1  
Vmn1r3  
Al481877  
Slc46a2  
Gm11240  
9130206I24Rik  
Foxe3  
Snrnp40  
Gm4123  
Pik3cd  
Hes3  
4930511M11Rik  
Rint1  
9530036O11Rik  
Med28  
Ncapg  
Pcdh7  
4930430O22Rik  
Ccdc60  
Dnajc30  
Uncx  
Sspo  
Stk31  
Mir196b  
Hoxa11as  
Tlx2  
Egr4  
Edem1  
Rpl32  
Gm7025  
Grik5  
Zfp574  
Map3k10  
Rgma  
P2ry6  
Fbrs  
Sec23ip  
A130023I24Rik  
Gm5606  
Irx5  
Nae1  
Car7  
Pdf  
Foxf1

Camkv  
Cspg5  
Setd2  
Srsf2  
Pde6g  
Gm9804  
Pole2  
Rmi1  
Ptk7  
Spata24  
Pcdhga3  
Tmem180  
Hoxd12  
Hoxd10  
B330016D10Rik  
Fam184b  
Vps37d  
Hoxa10  
Hoxa13  
Pcgf1  
Snora7a  
Pou2f2  
Sox1  
Cog8  
Mfsd11  
Pcdhgb1  
Hoxa11  
Efcab12  
Nip7
